# Supplementary material for: Identification of β-catenin target genes in colorectal cancer by interrogating gene fitness screening data
Source: PubMed Central journal article supplement — Oncol Lett. 2019 Aug 6;18(4):3769–77. doi: 10.3892/ol.2019.10724 (PMC6733007; doi:10.3892/ol.2019.10724), 2019-08-06
Supplement: Supplementary_Data.pdf [file Supplementary_Data.pdf]

Table SI. List of DepMap cell lines used in the present study to compute fitness profile correlations.

| DepMap ID  | CCLE Name               | Aliases            | In CRISPR | In RNAi |
|------------|-------------------------|--------------------|-----------|---------|
| ACH-000003 | CACO2_LARGE_INTESTINE   | CACO2;CACO2;CaCo-2 | -         | Y       |
| ACH-000007 | LS513_LARGE_INTESTINE   | LS513              | Y         | Y       |
| ACH-000009 | C2BBE1_LARGE_INTESTINE  | C2BBE1             | Y         | Y       |
| ACH-000202 | COLO320_LARGE_INTESTINE | COLO-320           | -         | Y       |
| ACH-000236 | SW1417_LARGE_INTESTINE  | SW1417             | -         | Y       |
| ACH-000249 | CL11_LARGE_INTESTINE    | CL-11              | -         | Y       |
| ACH-000252 | LS1034_LARGE_INTESTINE  | LS1034             | Y         | -       |
| ACH-000253 | COLO201_LARGE_INTESTINE | COLO 201           | Y         | Y       |
| ACH-000296 | OUMS23_LARGE_INTESTINE  | OUMS-23            | Y         | Y       |
| ACH-000350 | COLO678_LARGE_INTESTINE | COLO-678           | Y         | Y       |
| ACH-000360 | NCIH508_LARGE_INTESTINE | NCI-H508           | -         | Y       |
| ACH-000381 | T84_LARGE_INTESTINE     | T84                | Y         | -       |
| ACH-000400 | SKCO1_LARGE_INTESTINE   | SK-CO-1            | -         | Y       |
| ACH-000403 | NCIH747_LARGE_INTESTINE | NCI-H747           | Y         | Y       |
| ACH-000421 | SW837_LARGE_INTESTINE   | SW 837             | Y         | Y       |
| ACH-000467 | HCC56_LARGE_INTESTINE   | HCC-56             | Y         | -       |
| ACH-000470 | SW1463_LARGE_INTESTINE  | SW1463             | Y         | Y       |
| ACH-000491 | NCIH716_LARGE_INTESTINE | NCI-H716           | Y         | Y       |
| ACH-000532 | SNU61_LARGE_INTESTINE   | SNU-61             | -         | Y       |
| ACH-000538 | HUTU80_SMALL_INTESTINE  | HUTU80             | -         | Y       |
| ACH-000552 | HT29_LARGE_INTESTINE    | HT-29              | Y         | Y       |
| ACH-000651 | SW620_LARGE_INTESTINE   | SW 620             | Y         | Y       |
| ACH-000680 | SW948_LARGE_INTESTINE   | SW948              | -         | Y       |
| ACH-000683 | SNU503_LARGE_INTESTINE  | SNU-503            | Y         | -       |
| ACH-000722 | SNUC1_LARGE_INTESTINE   | SNU-C1             | -         | Y       |
| ACH-000798 | CL40_LARGE_INTESTINE    | CL-40              | Y         | -       |
| ACH-000820 | SW403_LARGE_INTESTINE   | SW403              | Y         | Y       |
| ACH-000842 | SW480_LARGE_INTESTINE   | SW 480             | -         | Y       |
| ACH-000895 | CL34_LARGE_INTESTINE    | CL-34              | -         | Y       |
| ACH-000926 | HT55_LARGE_INTESTINE    | HT55               | Y         | Y       |
| ACH-000935 | MDST8_LARGE_INTESTINE   | MDST8              | Y         | Y       |
| ACH-000943 | RKO_LARGE_INTESTINE     | RKO                | Y         | Y       |
| ACH-000950 | LOVO_LARGE_INTESTINE    | LoVo               | Y         | Y       |
| ACH-000955 | SNU407_LARGE_INTESTINE  | SNU-407            | -         | Y       |
| ACH-000957 | LS180_LARGE_INTESTINE   | LS 180             | Y         | Y       |
| ACH-000958 | SW48_LARGE_INTESTINE    | SW48               | Y         | Y       |
| ACH-000959 | SNUC4_LARGE_INTESTINE   | SNU-C4             | -         | Y       |
| ACH-000963 | CCK81_LARGE_INTESTINE   | CCK-81             | Y         | Y       |
| ACH-000967 | SNUC2A_LARGE_INTESTINE  | SNU-C2A            | -         | Y       |
| ACH-000969 | KM12_LARGE_INTESTINE    | KM12               | Y         | Y       |
| ACH-000971 | HCT116_LARGE_INTESTINE  | HCT 116            | -         | Y       |
| ACH-000982 | GP2D_LARGE_INTESTINE    | GP2d               | -         | Y       |
| ACH-000985 | LS411N_LARGE_INTESTINE  | LS411N             | -         | Y       |
| ACH-000986 | HT115_LARGE_INTESTINE   | HT115              | Y         | Y       |
| ACH-000991 | SNU81_LARGE_INTESTINE   | SNU-81             | -         | Y       |
| ACH-000997 | HCT15_LARGE_INTESTINE   | HCT-15             | -         | Y       |
| ACH-000998 | CW2_LARGE_INTESTINE     | CW-2               | -         | Y       |
| ACH-001039 | COLO205_LARGE_INTESTINE | COLO 205           | -         | Y       |
| ACH-001061 | DLD1_LARGE_INTESTINE    | DLD-1              | Y         | Y       |
| ACH-001091 | HRT18_LARGE_INTESTINE   | HRT18              | -         | Y       |

CCLE, Cancer Cell Line Encyclopedia; RNAi, RNA interference; Y, yes.
